# Supplementary material for: Identification of a de novo mutation of FOXG1gene and comprehensive analysis for molecular factors in Chinese FOXG1-related Rett syndrome
Source: Research Square preprint supplement (doi:10.21203/rs.3.rs-1953777/v1), 2022-08-26
Supplement: Supplementary file 2 [file c669f230e7aea8839a85131d.xlsx]

## Sheet: Sheet1
Cases	Our project	Zhang Q, et al. 2017	Yan N, et al, 2019	Zhang Q, et al. 2017	Zhang Q, et al. 2017	Zhang Q, et al. 2017	Wang F, etal, 2017	Li S, et al, 2021	Tang Z, et al, 2021	Bai Y,et al,2021	Bai Y,et al,2021	Bai Y,et al,2021
Patient No.	Patient 1	Patient 2	Patient 3	Patient 4	Patient 5	Patient 6	Patient 7	Patient 8	Patien 9	Patien 10	Patien 11	Patien 12
Sex	Female	Female	Female	Female	Female	Female	Female	Male	Female	Female	Female	Female
Age	23 m	12 m	29 m	54 m	20 m	2 y	9y	8 d	3 y	18m	24m	30m
Head circumstance (cm)	42	43	40.5	49	42	45.5	46	/	/	39	38.5	/
Microcephaly	Y	Y	Y	N	Y	Y	Y	/	/	Y	Y	/
Regression	N	N	Y	N	Y	N	/	/	/	N	N	Y
Bruxism	Y	Y, 12 m	/	Y, 12 m	Y, 19 m	N	/	/	/	/	/	/
Hypotonia	Y	Y	Y	Y	Y	Y	Y	Y, 8 d	/	Y	Y	Y
Stereotypic movements	Y	Y, 3 m	Y	Y, 10 m	Y, 12 m	Y, 8 m	Y	/	/	Y	Y	Y
Limited functional hand use	Y	Y	/	Y	Y	Y	Y	/	/	Y	Y	Y
Rising head (m)	Y,10m	Y, 8 m	Y, 11 m	Y, 5 m	Y, 7 m	Y, 2 m	Y, 36m	/	/	Y	Y	Y,9m
Sitting	N	N	N	Y, 12 m	N	Y, 10 m	Y, 48m	/	/	Y	Y	Y,11m
Walking	N	N	N	N, standing with aid at 24 m	N	N	Y,72m	/	/	N	N	N
Poor eye contact	Y	Y	Y	Y	/	Y	Y	/	Y	Y	Y	Y
Delayed speech	Y	Y	Y	Y	Y	Y	Y	/	Y	Y	Y	Y
Feeding difficulties	Y	Y	Y	Y	/	Y	Y	Y, 8 d	/	/	/	/
EEG abnormalities	Y	Y	Y	Y	Y	Y	Y	/	Y	N	N	N
Seizure onset time (m)	Y, 18m	Y, 10m	Y, 16 m	Y, 6m	Y, 10.5m	Y, 10.5m	Y, 4m	/	Y, ?	N	N	Y,13-15m
Seizure types	Generalized tonic-clonic	Partial	Generalized tonic-clonic	Partial	Partial	Partial	?	/	?	N	N	/
Seizure with cyanosis	N	Y	/	Y	Y	Y	/	/	/	N	N	Y
Sleep disturbances	Y	Y	Y	Y	N	Y	/	/	/	/	/	/
Corpus callosum hypoplasia	Y	Y	Y	Y	Y	Y	Y	Y	/	N	N	N
Delayed myelination or hypomyelination	Y	N	N	N	Y	N	/	/	/	N	N	N
Underdevelopment of frontal and temporal lobes	Y	Y	Y	Y	Y	Y, mild	Y	/	/	Y	Y	Y
