# Supplementary material for: Identification of a de novo mutation of FOXG1gene and comprehensive analysis for molecular factors in Chinese FOXG1-related Rett syndrome
Source: Research Square preprint supplement (doi:10.21203/rs.3.rs-1953777/v1), 2022-08-26
Supplement: Supplementary file 3 [file c6ab20deb4b8cf85de899e02.xlsx]

## Sheet: Sheet1
No.	Patient	Sex	Gene	Location (GRCh37)	Reference	Nucleotide	Amino acid	SNP ID	Consequence	Pathogenicity / Contribution	Zygosity	CHD Classification	Phenotypes	PMID
1	261674 (Patient 1)	46XY	PRKD1	14:30107911	NM_002742	c.896T​>G	p.Leu299Trp	rs1057519636	Missense	Likely pathogenic PM2+PP3+PS2+PP4	De novo Heterozygous	Syndromic	Arnold-Chiari type I malformation; Atrioventricular canal defect; Attention deficit hyperactivity disorder; Microcephaly; Nystagmus; Specific learning disability	27479907
2	263568 (Patient 3)	46XY	PRKD1	14:30095714	NM_002742	c.1774G​>A	p.Gly592Arg	rs1057519635	Missense	Likely pathogenic	De novo Heterozygous	Syndromic	2-3 toe syndactyly; Abnormal cardiac septum morphology; Abnormality of prenatal development or birth; Brachycephaly; Deep plantar creases; Depressed nasal bridge; Finger syndactyly; Fragile nails; Frontal bossing; Generalized hypotonia; High anterior hairline; Hypoplasia of teeth; Melanocytic nevus; Scoliosis; Sparse scalp hair; Stridor; Thin skin	27479907
3	268276 (Patient 2)	46XY	PRKD1	14:30095714	NM_002742	c.1774G​>A	p.Gly592Arg	rs1057519635	Missense	Pathogenic	De novo Heterozygous	Syndromic	Bilateral conductive hearing impairment; Broad thumb; Delayed speech and language development; Dry skin; Premature loss of primary teeth; Pulmonic stenosis; Short digit; Sparse scalp hair	27479907
4	272461	46XY	PRKD1	14:30135391	NM_002742	c.427C​>T	p.Gln143Ter	/	Stop gain	Pathogenic	Unknown Heterozygous	Syndromic	Depressed nasal bridge; Hypotonia; Moderate global developmental delay; Protruding tongue; Synophrys	/
5	413370	46XX	PRKD1	14:30093455	NM_002742	c.1808G​>A	p.Arg603His	rs776034417	Missense	Likely pathogenic PM2+PP3+PS2	De novo Heterozygous	Syndromic	Atrioventricular canal defect; Cleft palate; Deep plantar creases; Duplicated collecting system; Intestinal malrotation; Intrauterine growth retardation; Low-set, posteriorly rotated ears; Patent ductus arteriosus; Prominent nasal tip; Pulmonary artery stenosis; Sandal gap	/
6	Mendelics, 2019	/	PRKD1	14: 30102151	NM_002742	c.1316G>A	p.Arg439Gln	rs1439477100	Missense	Likely pathogenic	/	/	/	/
7	Shaheen et al, 2015	46XX	PRKD1	14:30093411	NM_002742	c.1852 C>T	p.Arg618Ter	rs201154555	Missense	Pathogenic	Homozygous	CHD	Type I Truncus arteriosus (TA); Cardiomegaly; No other systemic manifestations	25713110
8	Shaheen et al, 2015	46XX	PRKD1	14:30093411	NM_002742	c.1852 C>T	p.Arg618Ter	rs201154555	Missense	Pathogenic	Homozygous	CHD	Type I Truncus arteriosus (TA); Cardiomegaly; No other systemic manifestations	25713110
9	Massadeh S, 2021(III-1)	46XX	PRKD1	14:30194881	NM_002742	c.265-1A>G	/	/	Splice acceptor	Pathogenic	Homozygous	CHD	Pulmonary stenosis; Normal mental development; Normal motor development; Normal ueurological development	33919081
10	Massadeh S, 2021(III-2)	46XX	PRKD1	14:30194881	NM_002742	c.265-1A>G	/	/	Splice acceptor	Pathogenic	Homozygous	CHD	Type II tricuspid regurgitationand, ventricular septal defect (VSD); Normal mental development; Normal motor development; Normal ueurological development	33919081
11	Massadeh S, 2021(III-3)	46XX	PRKD1	14:30194881	NM_002742	c.265-1A>G	/	/	Splice acceptor	Pathogenic	Homozygous	CHD	Atrial septal defect (ASD); Septal defects; Normal mental development; Normal motor development; Normal neurological development	33919081
12	Massadeh S, 2021(II-3)	46XX	PRKD1	14:30194881	NM_002742	c.265-1A>G	/	/	Splice acceptor	Pathogenic	Homozygous	CHD	Septal defects; Normal mental development; Normal motor development; Normal neurological development	33919081
13	Massadeh S, 2021(II-4)	46XX	PRKD1	14:30194881	NM_002742	c.265-1A>G	/	/	Splice acceptor	Pathogenic	Homozygous	CHD	Septal defects; Normal mental development; Normal motor development; Normal neurological development	33919081
