# Supplementary material for: Identification of a de novo mutation of FOXG1gene and comprehensive analysis for molecular factors in Chinese FOXG1-related Rett syndrome
Source: Research Square preprint supplement (doi:10.21203/rs.3.rs-1953777/v1), 2022-08-26
Supplement: Supplementary file 4 [file ff9ad9e2af61d3e42d696241.xlsx]

## Sheet: Sheet1
No.	Patient	Sex	Location	Length	Type	Inheritance / Genotype	Pathogenicity / Contribution	Systems	Phenotype
1	252353	46XX	14:29904720-30316660	411.94 kb	Deletion	De novo Heterozygous	/	Cardiovascular system	Ventricular septal defect
								digestive system	Feeding difficulties in infancy
								Growth	Intrauterine growth retardation
								Head or neck	Blepharophimosis; Prominent nasal bridge; Short philtrum; Thick upper lip vermilion; Upslanted palpebral fissure
								Musculoskeletal system	Microcephaly
								Nervous system	Hypoplasia of the corpus callosum; Intellectual disability
2	358785	46XX	14:29829325-30348258	518.93 kb	Deletion	De novo Heterozygous	Likely pathogenic	Musculoskeletal system	Secondary microcephaly
								Nervous system	Agenesis of corpus callosum; Intellectual disability
3	414554	46XX	14:29864986-30273103	408.12 kb	Deletion	De novo Heterozygous	Likely pathogenic	Musculoskeletal system	Microcephaly; Hypotonia; Joint hyperflexibility; Muscular hypotonia of the trunk
								Nervous system	Delayed myelination; Global developmental delay; Seizure; Simplified gyral pattern
4	259935	46XX	14:30173912-30970162	796.25 kb	Deletion	Unknown Heterozygous	/	Ear	Low-set ears
								Head or neck	Abnormality of the columella; Abnormality of the philtrum; Microdontia
								Integument	Low anterior hairline
								Musculoskeletal system	Clinodactyly of the 5th finger; Joint laxity; Sandal gap; Slender finger
								Nervous system	Behavioral abnormality; Intellectual disability
5	284715	46XY	14:30173942-30325824	151.88 kb	Deletion	Maternally inherited Heterozygous	/	/	/
6	258584	46XX	14:29781404-30552936	771.53 kb	Deletion	De novo Heterozygous	/	Cardiovascular system	Hypertension
								Endocrine system	Hypothyroidism
								Growth	Obesity
								Musculoskeletal system	Hypotonia
								Nervous system	Behavioral abnormality; Seizure; Delayed speech and language development; Intellectual disability
7	248405	46XY	14:29695258-30872374	1.18 Mb	Deletion	De novo Heterozygous	/	Musculoskeletal system	Microcephaly
						Heterozygous		Nervous system	Intellectual disability
8	260836	46XY	14:29538005-30335064	797.06 kb	Deletion	Unknown Heterozygous	/	Musculoskeletal system	Hypotonia; Microcephaly
								Nervous system	Intellectual disability
9	3810	46XX	14:29695258-30872374	1.18 M	Deletion	De novo Heterozygous	/	Digestive system	Feeding difficulties in infancy
								Growth	Short stature
								Head or neck	Short nose
								Integument	Medial flaring of the eyebrow
								Musculoskeletal system	Microcephaly; Flexion contracture; Overlapping toe; Short toe
								Nervous system	Hypoplasia of the corpus callosum; Delayed speech and language development; Intellectual disability; Seizure; Bruxism
10	283016	46XY	14:29829325-30220298	390.97 kb	Duplication	Maternally inherited Heterozygous	/	Cardiovascular system	Tetralogy of Fallot; Abnormality of cardiovascular system morphology
								Eye	Nystagmus
								Nervous system	Autistic behavior
11	380299	46XX	14:30316660-30551406	234.75 kb	Duplication	Unknown Heterozygous	Uncertain Uncertain	/	/
12	14q12; GRCh37/hg19 14q12(chr14:30046219-30150025)x3	/	14:30046219-30150025	103.81 kb	Duplication	Unknown Heterozygous	Likely benign	/	/
13	nssv13647033; GRCh37/hg19 14q12(chr14:29372798-30197863)x3	/	14:29372798-30197863	825.07 kb	Duplication	/	Uncertain	/	Developmental delay AND/OR other significant developmental or morphological phenotypes
14	nssv13643620; GRCh37/hg19 14q12(chr14:29938570-30792424)x3	/	14: 29938570-30792424	853.86 kb	Duplication	/	Uncertain	/	Developmental delay AND/OR other significant developmental or morphological phenotypes
